# Supplementary material for: Heterogeneous Fenton Degradation of Patulin in Apple Juice Using Carbon-Encapsulated Nano Zero-Valent Iron (CE-nZVI)
Source: PubMed Central journal article supplement (PMC7278583; doi:10.3390/foods9050674), 2020-05-24
Supplement: foods-09-00674-s001.pdf [file foods-09-00674-s001.pdf]

Supplementary material

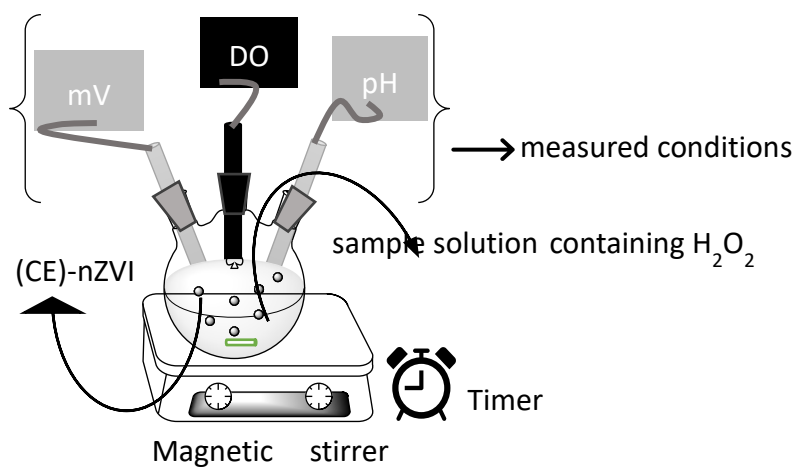

**Figure S1.** Shows the reaction setup for Fenton oxidation system

**Table S1.** Concentration of dissolved iron ions at 4-hour time interval.

| pH  | Fe <sup>2+</sup> /Fe <sup>3+</sup> mg/l |
|-----|-----------------------------------------|
| 3.5 | 1.64                                    |
| 4.5 | 0.01                                    |
| 5   | 0.05                                    |
| 6   | 0.10                                    |
